# Supplementary material
Source: PubMed Central journal article supplement (PMC4226353)
Supplement: supp_pp.113.234864_234864Supplemental_Tables_figures_mod.pdf [file supp_pp.113.234864_234864Supplemental_Tables_figures_mod.pdf]

**Supplemental Table I. Distribution of percent length coverage for the top matching UniProt database entries.**

| Percentage length coverage bin | Count in bin | Cumulative count |
|--------------------------------|--------------|------------------|
| 100                            | 3071         | 3071             |
| 90                             | 1205         | 4276             |
| 80                             | 851          | 5127             |
| 70                             | 806          | 5933             |
| 60                             | 752          | 6685             |
| 50                             | 697          | 7382             |
| 40                             | 653          | 8035             |
| 30                             | 532          | 8567             |
| 20                             | 362          | 8929             |
| 10                             | 0            | 8929             |
| 0                              | 0            | 8929             |

Examples of statements that can be made based on above table:

- 3071 database proteins matches to a Trinity transcript by > 90% alignment coverage.
- 1205 database proteins matches to a Trinity transcript with an alignment coverage between 80% and 90%.
- 4276 database proteins matches to a Trinity transcript by > 80% alignment coverage.

**Supplemental Table II. Size statistics and percentage of read mapping to annotated and un-annotated transcripts.**

|                               | Annotated_transcripts | Un-annotated transcripts |
|-------------------------------|-----------------------|--------------------------|
| N50(bp)                       | 1879                  | 649                      |
| Average_transcript_length(bp) | 1478                  | 524                      |
| Median_transcript_length(bp)  | 1278                  | 387                      |
| %total_mapped_reads           | 72.90                 | 6.50                     |
| %Uniquely_mapped_reads        | 49.25                 | 4.86                     |

**Supplemental Table III. Primers used in RT-PCR analysis.**

| <b>Transcript number<br/>(Cpent_contig)</b> |            | <b>Sequence (5' to 3')</b> |
|---------------------------------------------|------------|----------------------------|
| 272246                                      | Sense      | AAGGCCAACAAGCAAGATTATTA    |
|                                             | Anti-sense | ATTTCTTCTCCCCACCATATAA     |
| 47491                                       | Sense      | GAAAGAAGAAACGAAATTTGTGC    |
|                                             | Anti-sense | TCAAAGTGTCAACCTTGCATTC     |
| 136661                                      | Sense      | TGATGATCCTTTTGAAGAATACGA   |
|                                             | Anti-sense | CAATCCCAAGATGATTCCTTACA    |
| 145193                                      | Sense      | TCTTGATCTGTGTCAGGACCTTT    |
|                                             | Anti-sense | ACTTCTCCCAATCATTACCCAAC    |
| 43255                                       | Sense      | TGATGATAGTGCATTTGTGAAGG    |
|                                             | Anti-sense | GGATGATACACAGTGAACCTTGG    |
| 129211                                      | Sense      | TGCCATCATCATTATTAAGCATT    |
|                                             | Anti-sense | CGGCTTCTTCTTGTTATTCTTCC    |
| 69651                                       | Sense      | ATGATTTGCCTAGCTTCACTCAA    |
|                                             | Anti-sense | TGATTCTCCTCCTTGTCAATTTGT   |
| 38878                                       | Sense      | AATCGCAATGATGAGTTCTTGTT    |
|                                             | Anti-sense | CAGCTTCATGGAGTATTTGATCC    |
| 221563                                      | Sense      | CTCGAATAACAGAAGCAGCAAGT    |
|                                             | Anti-sense | GTCCAGATATGACCTTGAAGCAG    |
| 132201                                      | Sense      | ATGGAAAGTTGGTCCAGAAAGA     |
|                                             | Anti-sense | ATCTCTGCCCTGTCGATAAGAA     |
| 76374                                       | Sense      | CCATTTGAAGGTGGAGTTTTTC     |
|                                             | Anti-sense | AATAATTGCCCGACAGACAGAT     |

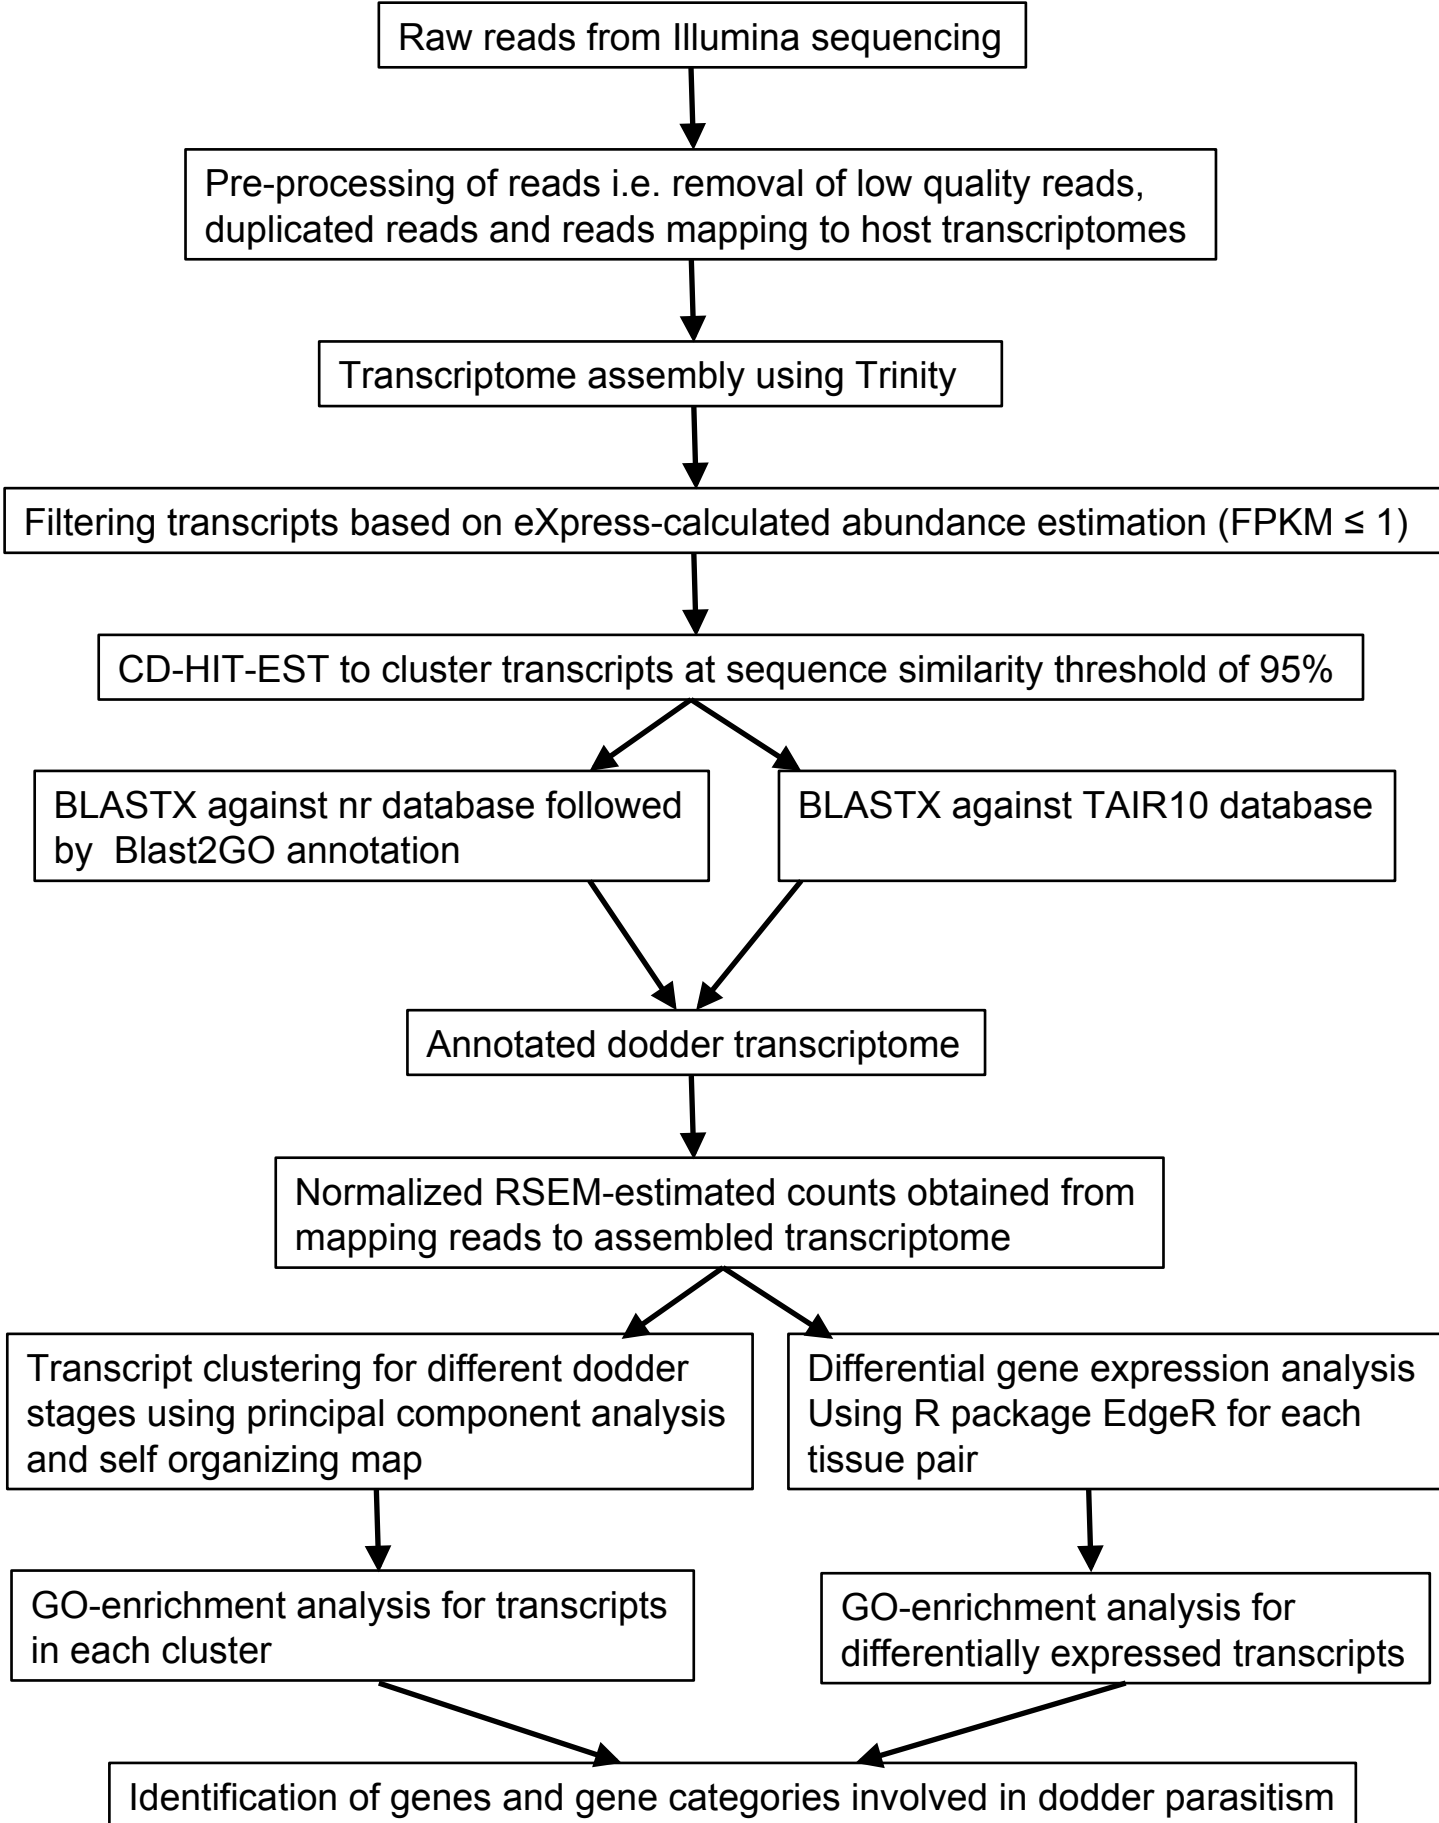

Supplemental Figure S1. Flow-chart showing steps in dodder transcriptome assembly and annotation, and downstream transcript clustering and differential expression analysis

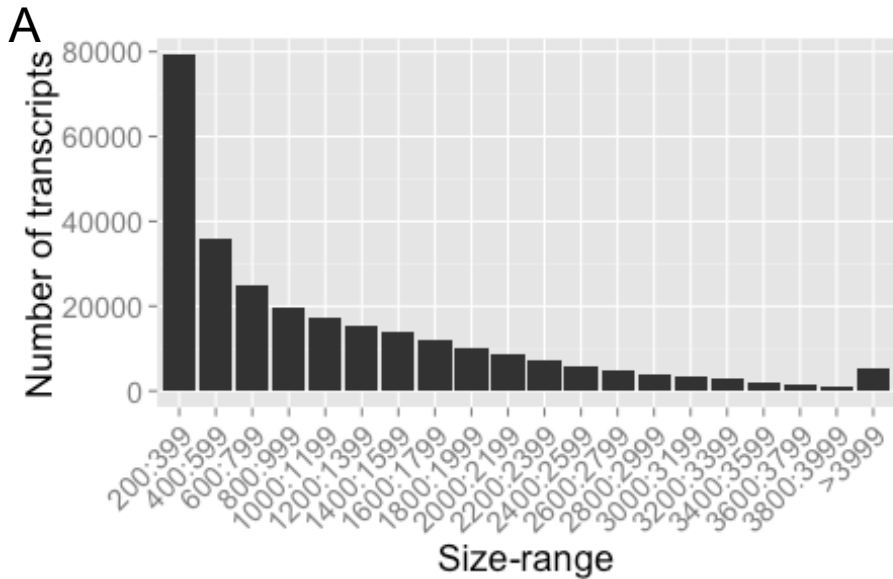

Supplemental Figure S2. Transcript size distribution for Dodder\_all\_transcriptome

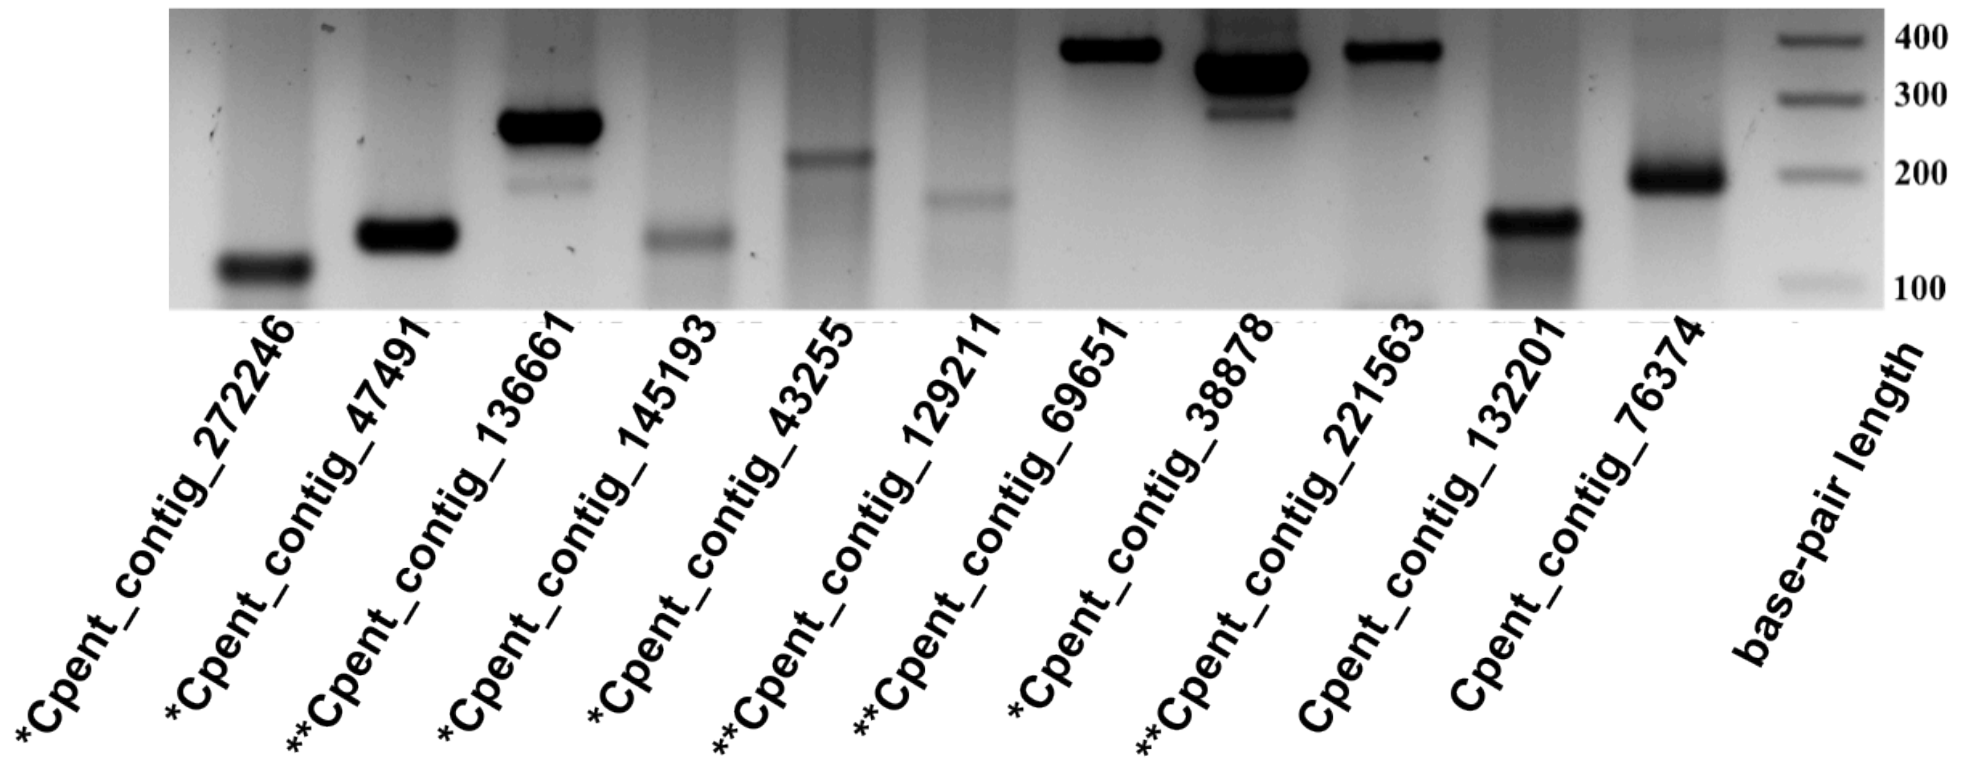

Supplemental Figure S3. Expression of non-annotated transcripts as detected by RT-PCR in dodder stems. Contigs with single asterisk are non-annotated transcripts with a predicted ORF, whereas with double asterisks are non-annotated transcripts without a predicted ORF. Cpent\_contig\_132201 and Cpent\_contig\_76374 were used as controls which are annotated as *CAP-BINDING PROTEIN 20* and *UBIQUITIN-CONJUGATING ENZYME 21*, respectively and found to be highly expressed in all tissues from expression data.

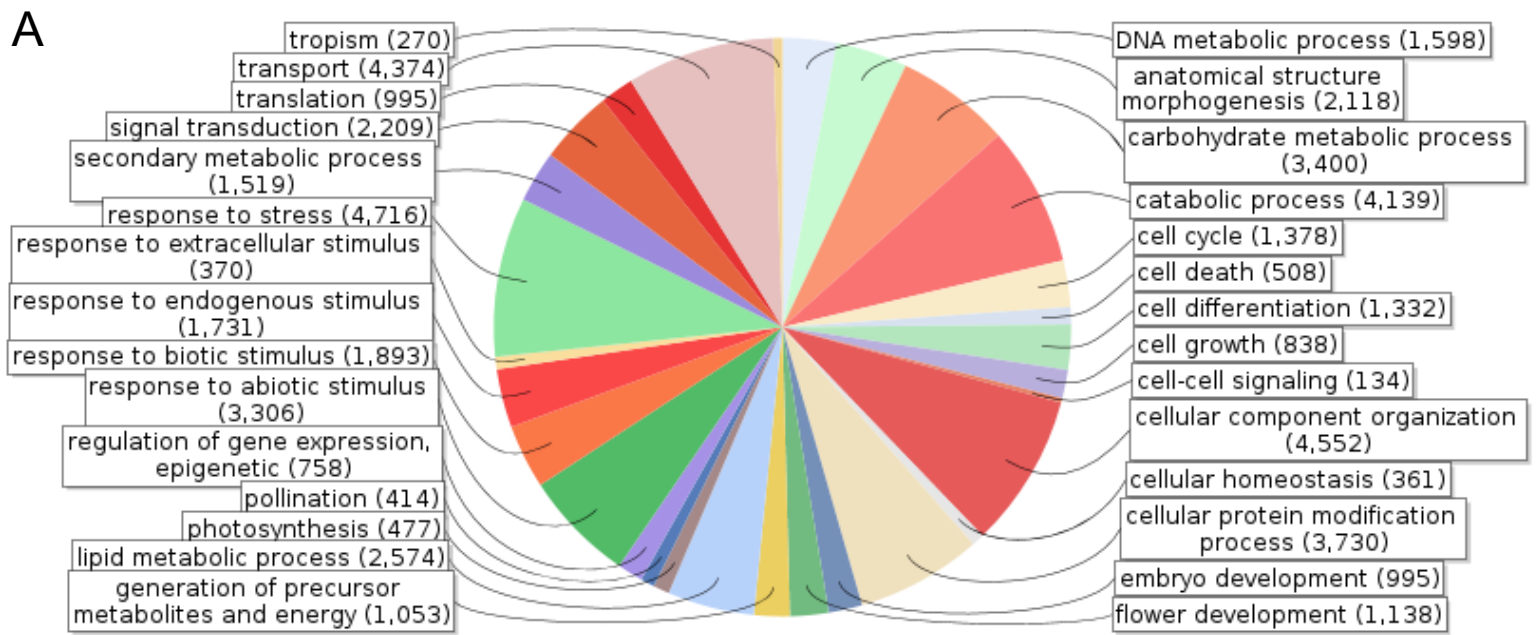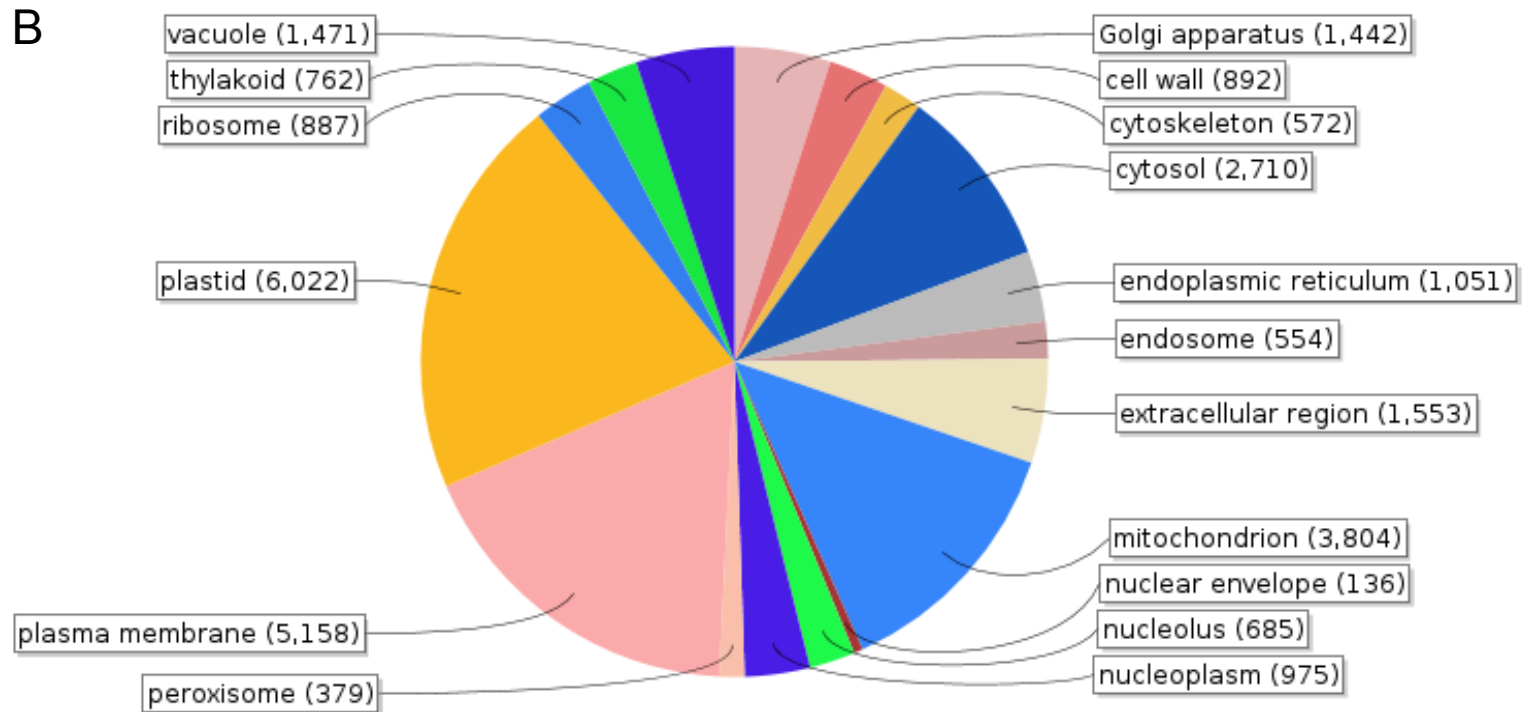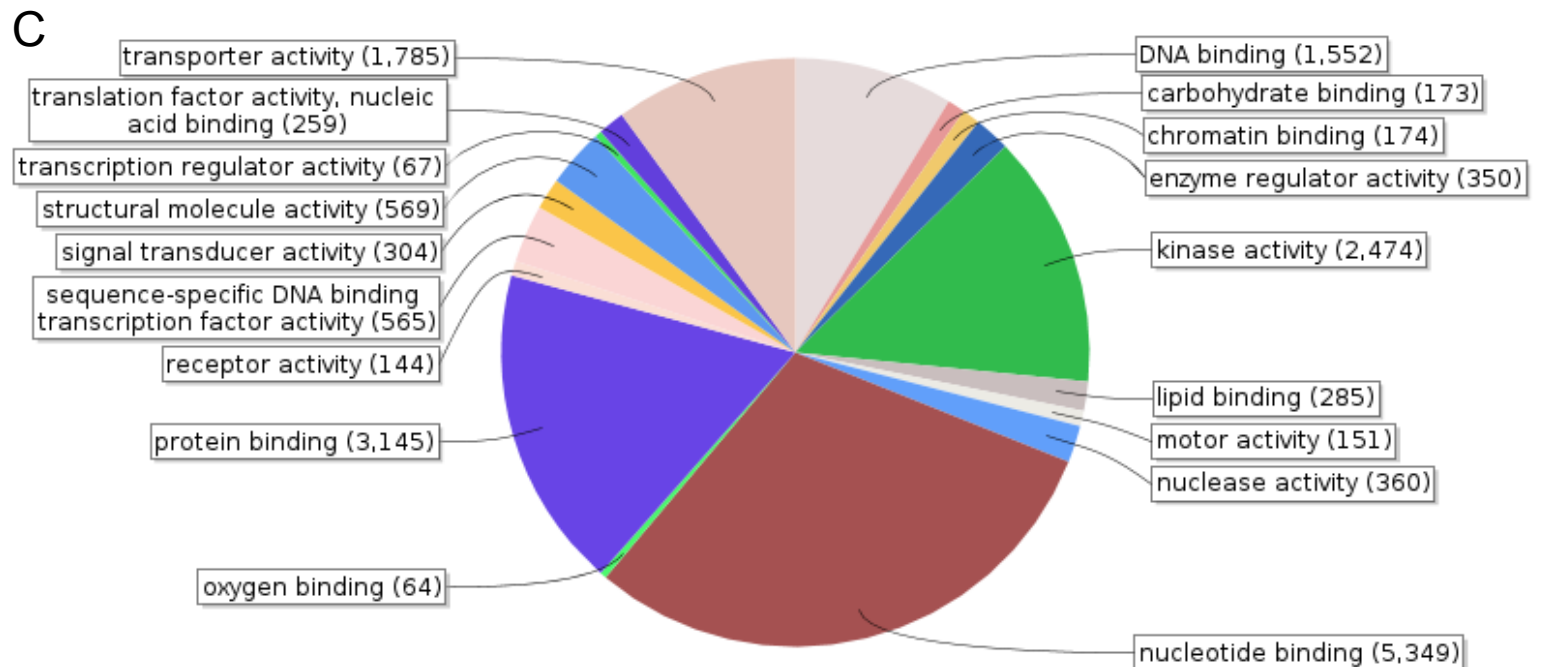

Supplemental Figure S4. Pie charts for multilevel GO distribution of annotated transcripts in three categories: biological processes (A), cellular components (B) and molecular function (C).

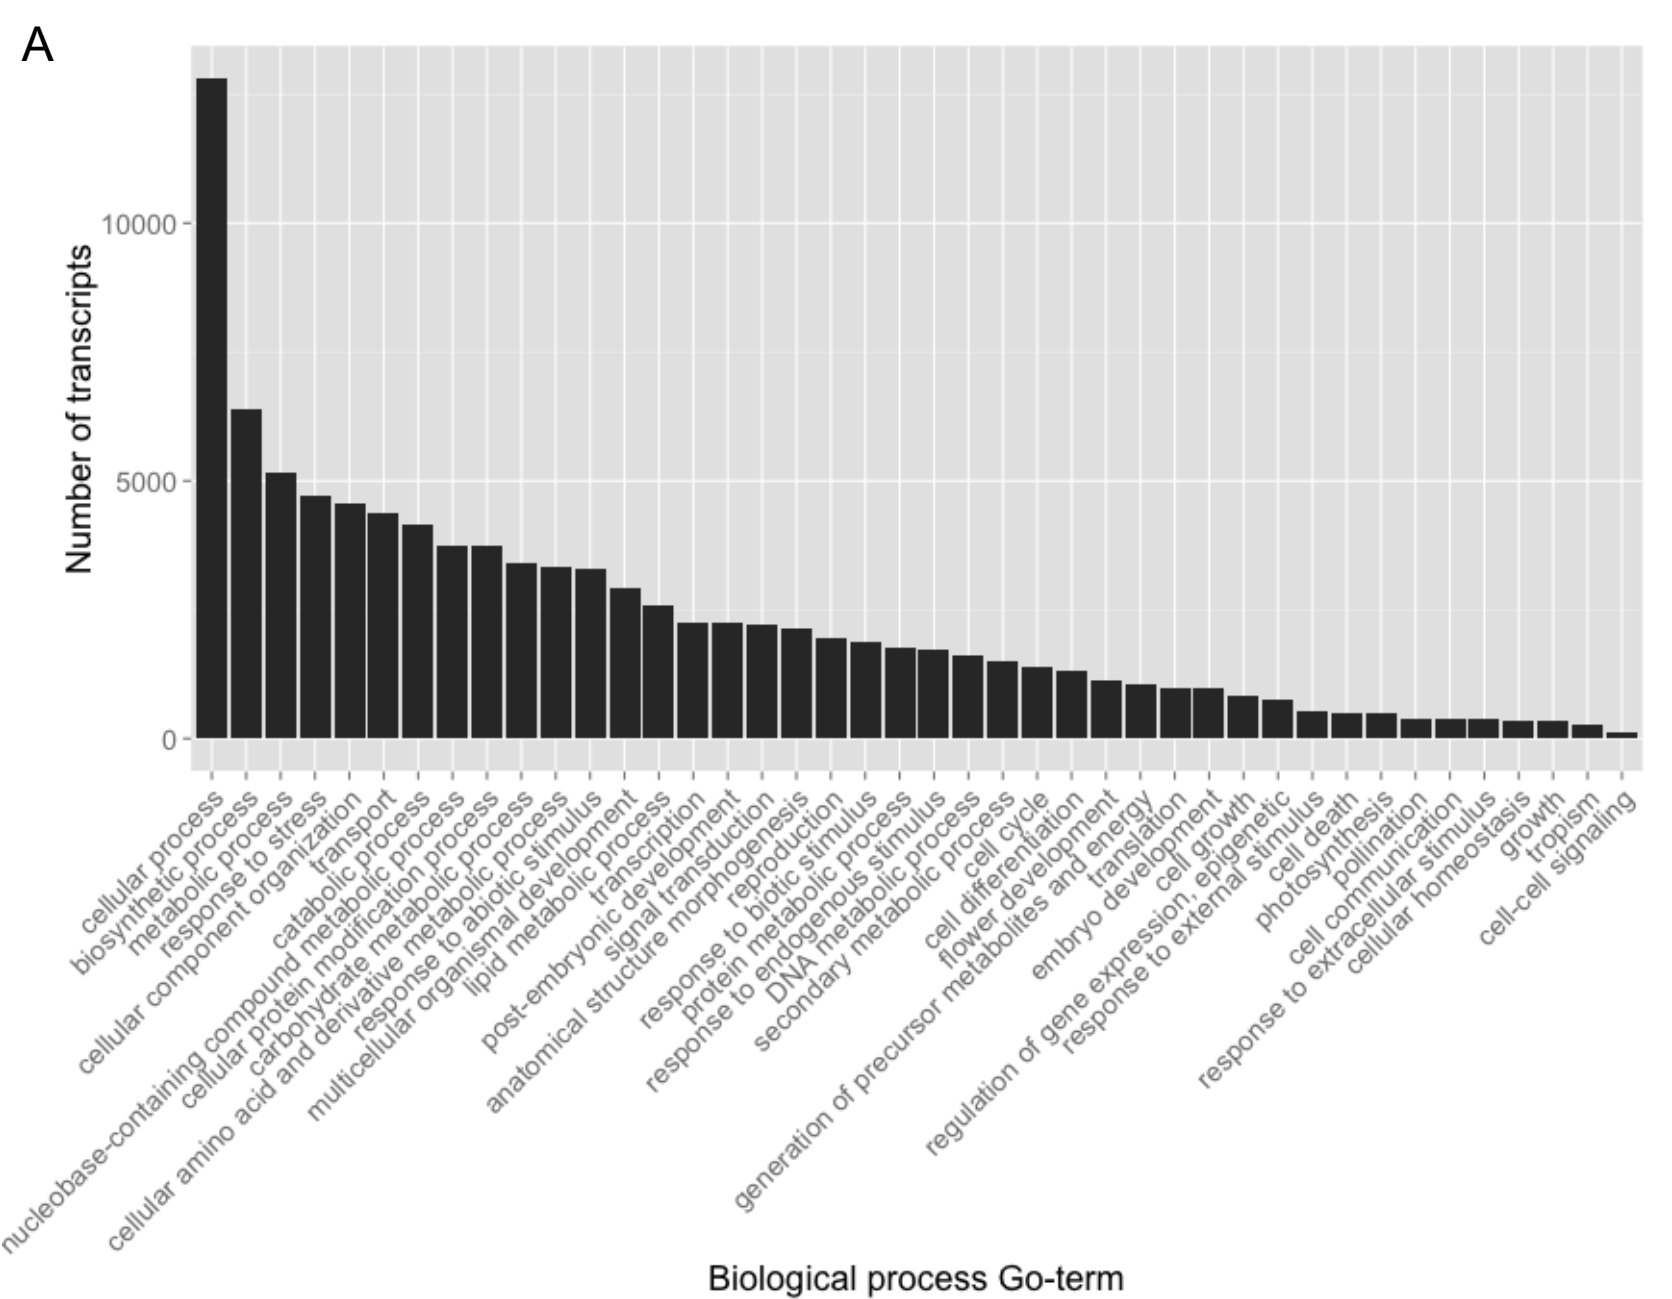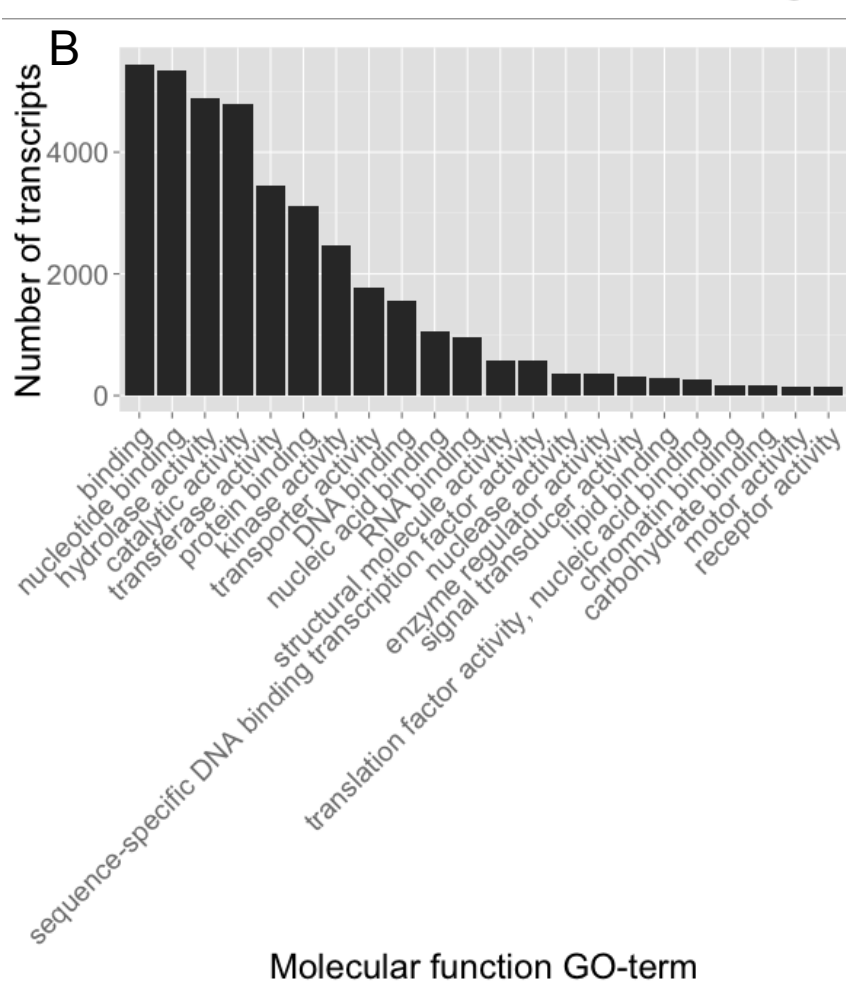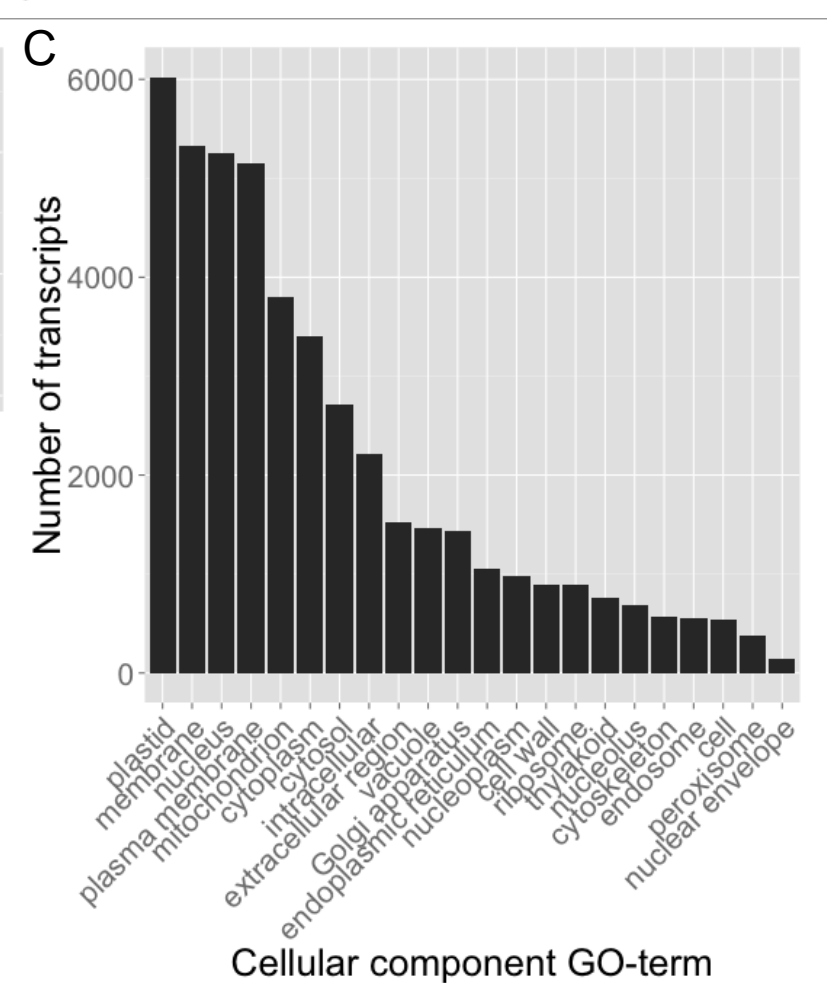

Supplemental Figure S5. Histogram representation of GOslim classification in three categories: biological processes (A), molecular function (B) and cellular components (C).



# Enzyme Code Distribution

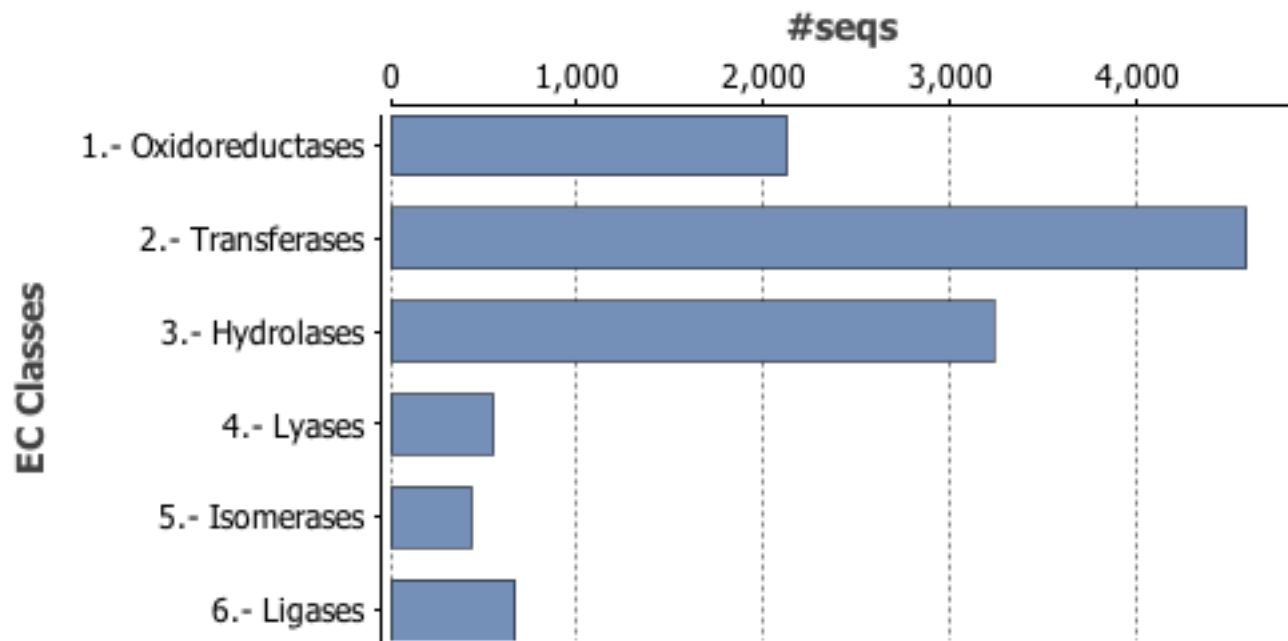

Supplemental Figure S6. Distribution of transcripts annotated as enzymes among different enzyme classes.

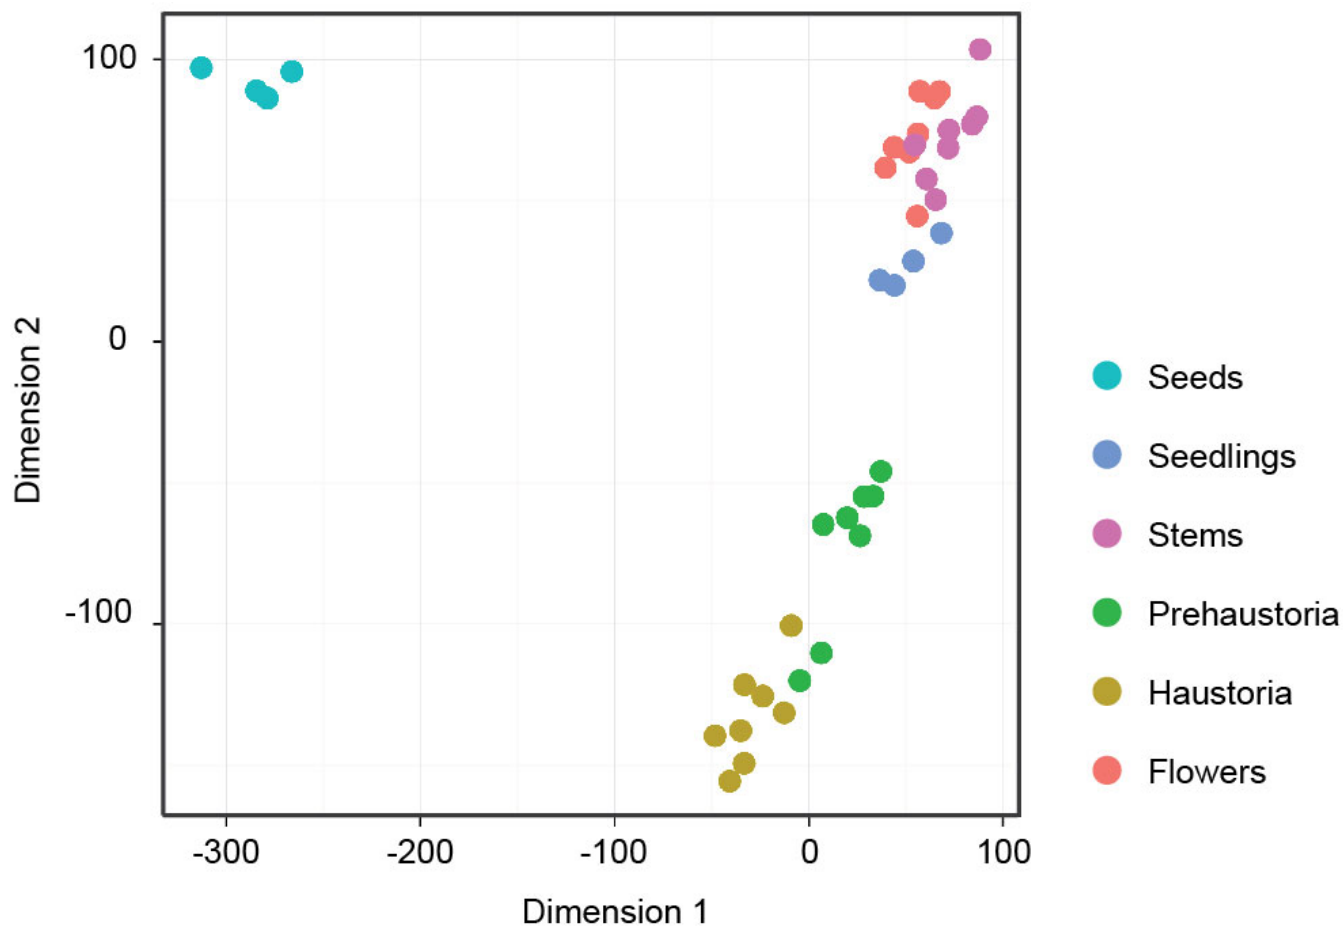

Supplemental Figure S7. Multidimensional scaling (MDS) plot of all replicates of each dodder tissue used for transcriptome assembly and, subsequently, transcript clustering and differential expression analysis. There were eight replicates for stems, prehaustoria, haustoria and flowers (four replicates each from dodder grown on two host plants, tomato and tobacco) and four replicates for seeds and seedlings.
